# Supplementary material for: Comparative toxicity of bimetallic Fe nanoparticles toward Escherichia coli: mechanism and environmental implications
Source: Royal Society of Chemistry journal article supplement (doi:10.1039/c3en00057e), 2014-01-01
Supplement: c3en00057e1.pdf [file c3en00057e1.pdf]

## Electronic Supplementary Information

### **Comparative toxicity of bimetallic Fe nanoparticles toward *Escherichia coli*: mechanism and environmental implications**

*Eun-Ju Kim, Thao Le Thanh, and Yoon-Seok Chang\**

*School of Environmental Science and Engineering, Pohang University of Science and  
Technology (POSTECH), Korea*

*E-mail : yschang@postech.ac.kr*

1. Experimental details
2. Table S1 and Table S2
3. Fig. S1 ~ 3

## 1. Experimental details

**1) Preparation of bimetallic Fe NPs.** Bimetallic Fe NPs were synthesized via displacement plating of Fe NPs with each metal additive. First, Fe NPs were prepared by reducing 0.5 M FeCl<sub>3</sub> with 0.8 M NaBH<sub>4</sub>. Then, the Fe NPs were immersed in 1 mM solutions of the respective metal salts, and the mixture was allowed to react for 30 min on a rolling mixer. The resulting suspension was centrifuged and rinsed several times with degassed, deionized water by purging with N<sub>2</sub> for 1 h.

**2) Characterization of NPs.** High-resolution transmission electron microscopy (HRTEM) and energy-filtered TEM (EFTEM) analysis of the NPs were carried out using a JEM-2200FS microscope (JEOL) with Cs-correction at the operating voltage of 200 kV. X-ray photoelectron spectroscopy (XPS) spectra were obtained by a VGESCALAB 250 (Thermo VG Scientific) with a monochromatic Al K $\alpha$  excitation source (1486.6 eV). The hydrodynamic size and zeta potential measurements were performed in a dilute aqueous NP suspension (20 mg/L) with a Zetasizer ELSZ-1000 (OTSUKA).

**3) Antibacterial tests.** *Escherichia coli* DH5 $\alpha$  was used as a test organism. *E. coli* was grown aerobically at 37 °C for 12–16 h in Luria-Bertani (LB) medium. The saturated cultures were diluted in ultrapure water to OD<sub>600</sub> = 0.05. The cells were incubated with different concentrations of NPs (10, 100, and 500 mg/L) at 37 °C under gentle stirring (160 rpm). Untreated cells were employed as a control. After 10 h incubation, aliquots were taken, and serially diluted. The dilutions were plated in triplicate on LB agar plates and incubated overnight at 37 °C, and colonies were counted.

**4) Analysis of intracellular reactive oxygen species (ROS).** Intracellular ROS assays were performed using the ROS-sensitive fluorescent probe, 2,7-dichlorodihydrofluorescein diacetate (DCF-DA). The cells were exposed to 100 mg/L of NPs for 3 h, and then further incubated in water containing 10  $\mu$ M of DCF-DA for 30 min in a dark. The fluorescence intensity was analyzed by a Shimadzu RF-5301 spectrofluorometer and a confocal Zeiss LSM 510 Meta scanning microscope with excitation at 480 nm and emission at 530 nm.

**5) Glutathione peroxidase (GPx) assay.** GPx activity was determined spectrophotometrically by monitoring the oxidation of NADPH in the presence of glutathione, glutathione reductase,

and cell homogenate at 340 nm with a commercial kit supplied by BioVision. The enzyme units were expressed as nmol NADPH consumption/min/mg protein.

**6) FTIR sample preparation and analysis.** *E. coli* suspensions treated by 100 mg/L NPs were centrifuged, and the precipitates were dried at 60 °C overnight. Specimens for FTIR were made by compressing the mixture of 1 mg bacterial sample and 100 mg KBR into pellets using a hydraulic press. FTIR spectra were recorded on a Bomem MB-104 FTIR spectrometer in the 4000–500 cm<sup>-1</sup> range.

**7) TEM analysis of NP-treated cells.** Harvested cells were fixed with 1% formaldehyde and 1% glutaraldehyde, dehydrated in ethanol, and embedded in EMBED 812 and propylene oxide before being sectioned by an ultra-tome. The bacterial sections were analyzed with a Hitachi H-7600 TEM.

**8) Chemical analysis.** The deposited metal content (wt %) was determined by an inductively coupled plasma-atomic emission spectrometer (ICP-AES, IRIS-AP) after digesting the particles with 0.2 M HCl. The concentration of dissolved iron was also quantified using an ICP-AES. The anions were measured by an ion chromatograph (IC, Dionex DX-120) that was equipped with a conductivity detector and an AS-14 (4 mm × 25 mm) column.

**Table S1.** Physical and chemical properties of bare and bimetallic Fe NPs.

| Particle | Deposited metal content (wt%) | Primary particle size (nm) <sup>a</sup> | Hydrodynamic particle size (nm) | Zeta potential (mV) |
|----------|-------------------------------|-----------------------------------------|---------------------------------|---------------------|
| Fe       | –                             | 50 – 70                                 | 866.4 ± 130.5                   | 26.3 ± 1.23         |
| Fe/Pd    | 2.8                           |                                         | 1312.3 ± 233.1                  | 22.4 ± 0.89         |
| Fe/Ni    | 2.0                           |                                         | 810.7 ± 187.5                   | 27.5 ± 3.13         |
| Fe/Cu    | 1.9                           |                                         | 691.1 ± 156.3                   | 33.9 ± 2.17         |
| Fe/Pt    | 3.2                           |                                         | 991.2 ± 270.6                   | 16.5 ± 1.15         |

<sup>a</sup> From TEM images (n=100).

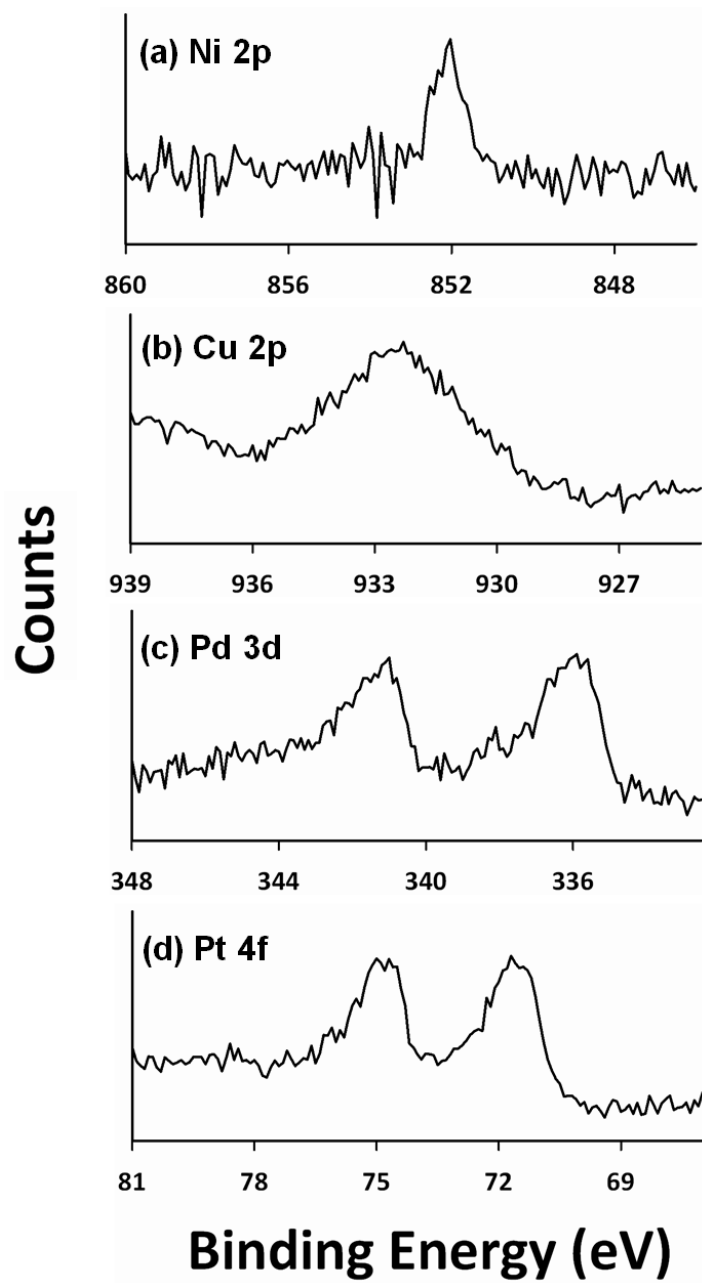

**Fig. S1** XPS spectra obtained from (a) Fe/Ni, (b) Fe/Cu, (c) Fe/Pd, and (d) Fe/Pt.

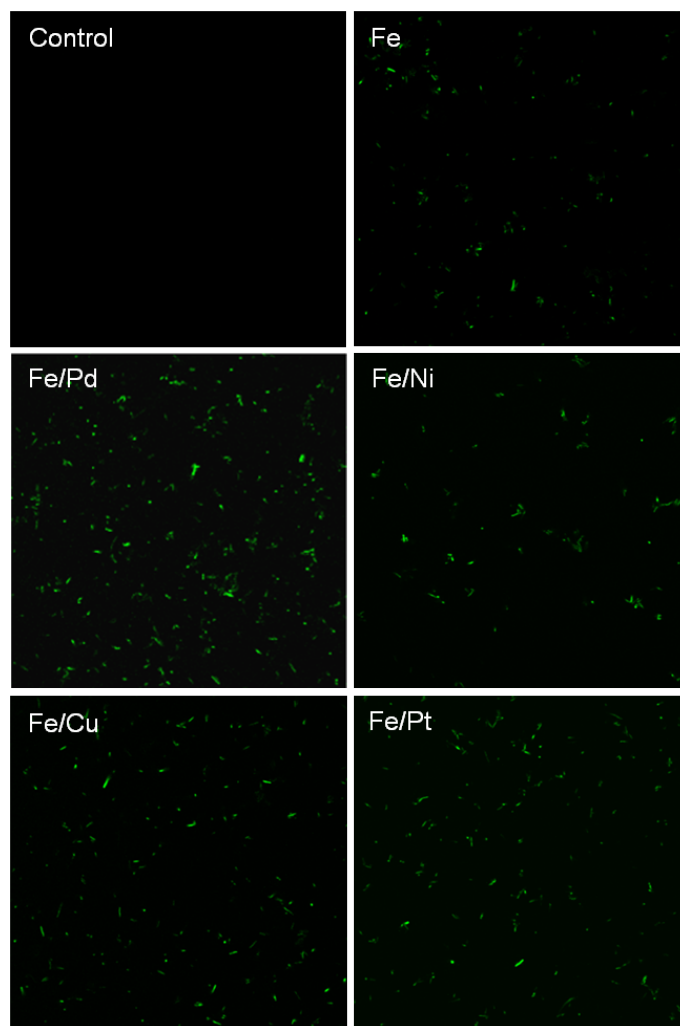

**Fig. S2** Confocal microscopic images of native and NPs (100 mg/L)-treated cells for 3 h subjected to DCF-DA staining.

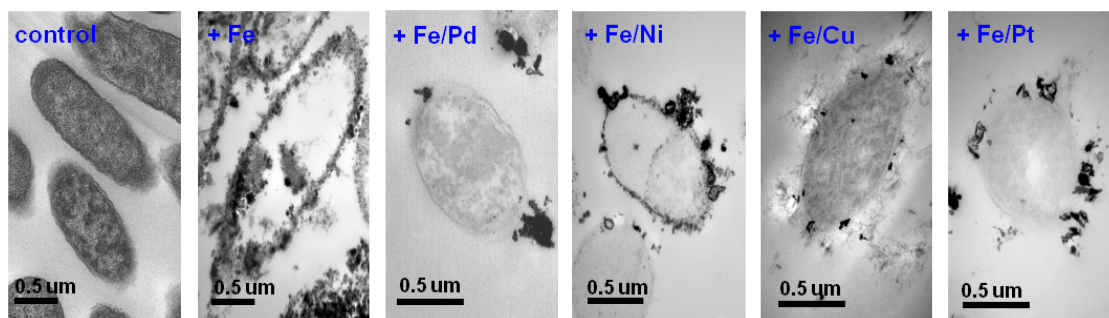

**Fig. S3** TEM images of native and NPs-treated cells. *E. coli* cells were exposed to 100 mg/L NPs for 10 h.

**Table S2.** Summary of toxicological responses induced by NPs exposure.

| Particle | DCF-DA fluorescence | GPx activity (mU/mL) | Dissolved Fe conc. <sup>a</sup> (μM) | IR intensity  |                              |                  | Anion conc. (μM) |                               |                               |
|----------|---------------------|----------------------|--------------------------------------|---------------|------------------------------|------------------|------------------|-------------------------------|-------------------------------|
|          |                     |                      |                                      | C-O/<br>C-O-C | PO <sub>2</sub> <sup>-</sup> | -CH <sub>3</sub> | Cl <sup>-</sup>  | PO <sub>3</sub> <sup>2-</sup> | SO <sub>4</sub> <sup>2-</sup> |
| None     | 15.5 ± 0.95         | 0.010 ± 0.004        | 0.00                                 | strong        | strong                       | strong           | 2.75 ± 1.06      | 0.00                          | 0.00                          |
| Fe       | 53.4 ± 5.32         | 0.292 ± 0.009        | 9.08 ± 0.11                          | weak          | weak                         | weak             | 30.7 ± 1.02      | 64.1 ± 1.48                   | 0.00                          |
| Fe/Pd    | 117.6 ± 1.60        | 0.173 ± 0.014        | 1.54 ± 0.09                          | strong        | strong                       | strong           | 14.9 ± 0.14      | 52.2 ± 2.19                   | 1.75 ± 0.35                   |
| Fe/Ni    | 72.5 ± 3.03         | 0.464 ± 0.045        | 5.22 ± 0.12                          | strong        | strong                       | weak             | 10.4 ± 0.78      | 62.7 ± 2.05                   | 38.9 ± 1.90                   |
| Fe/Cu    | 98.3 ± 4.53         | 0.190 ± 0.017        | 2.77 ± 0.08                          | weak          | weak                         | weak             | 16.3 ± 0.57      | 68.9 ± 2.69                   | 0.00                          |
| Fe/Pt    | 114.6 ± 4.71        | 0.181 ± 0.003        | 2.16 ± 0.22                          | strong        | strong                       | strong           | 17.9 ± 0.14      | 38.7 ± 1.84                   | 2.45 ± 0.92                   |

<sup>a</sup> Data after 10 h exposure
